# Supplementary material for: miR-217 and CAGE form feedback loop and regulates the response to anti-cancer drugs through EGFR and HER2
Source: PubMed Central journal article supplement (PMC4891121; doi:10.18632/oncotarget.7185), 2016-02-04
Supplement: oncotarget-07-10297-s001.pdf [file oncotarget-07-10297-s001.pdf]

## miR-217 and CAGE form feedback loop and regulates the response to anti-cancer drugs through EGFR and HER2

### Supplementary Materials

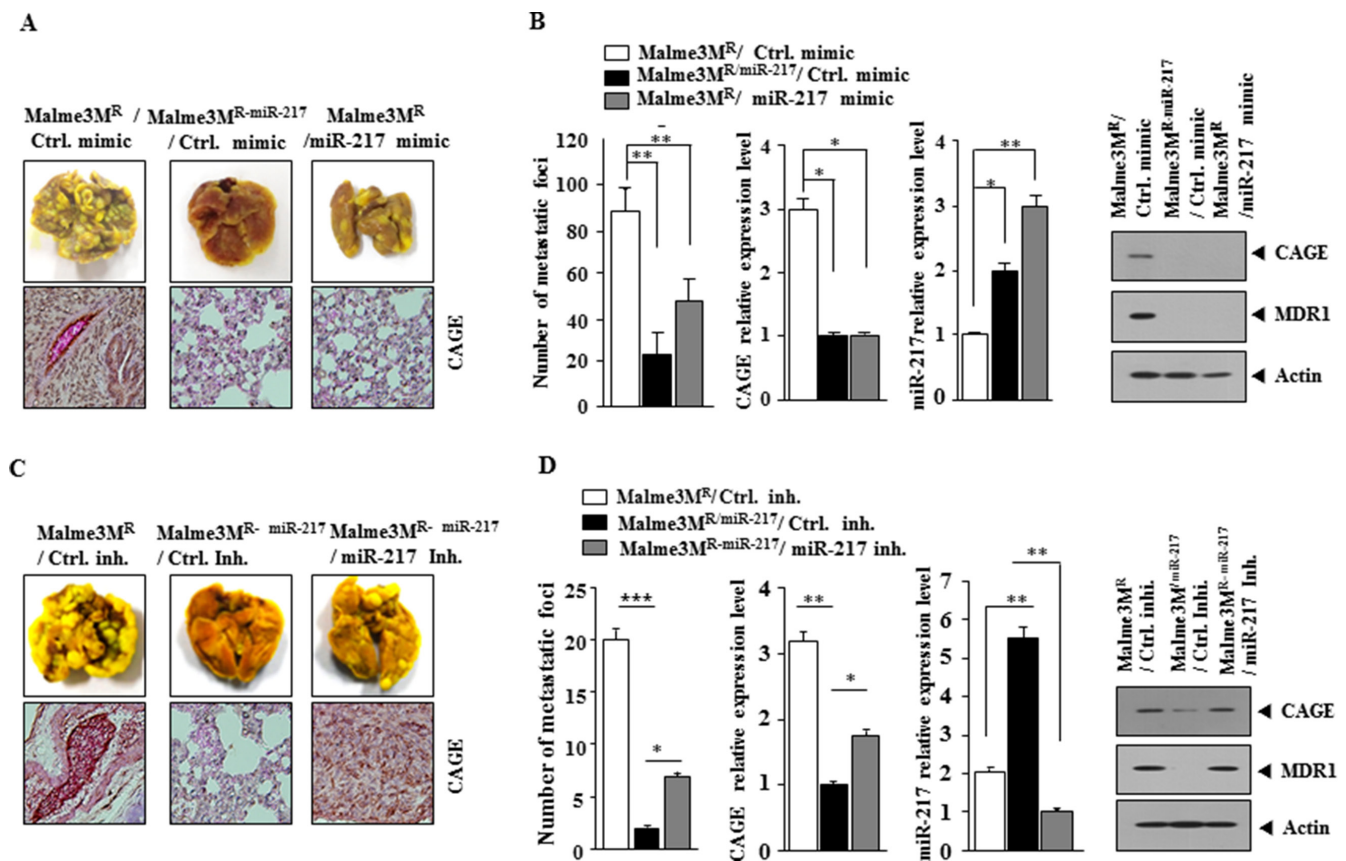

**Supplementary Figure S1: miR-217 negatively regulates the metastatic potential of Malme3M<sup>R</sup> cells.** (A) Each experimental group consists of five athymic nude mice. Each figure shows a representative image of the mice in each experimental group. Control mimic (50  $\mu$ M/kg) or miR-217mimic (50  $\mu$ M/kg) was intravenously injected five times over a total of 4 weeks. Arrows show the metastatic foci. The extent of lung metastases was quantified by staining with Bouin's solution. Immunohistochemistry staining employing lung tumor tissue was performed as described. (B) QRT-PCR analysis employing lung tumor tissue was performed to determine the expression of CAGE and miR-217. Lung tumor tissue lysates were also subjected to immunoblot analysis. \* $p < 0.05$ ; \*\* $p < 0.005$ . (C) Same as (A) except that control inhibitor (50  $\mu$ M/kg) or miR-217 inhibitor (50  $\mu$ M/kg) was intravenously injected five times over a total of 4 weeks. Immunohistochemistry staining employing lung tumor tissue was performed as described. (D) Lung tumor lysates were isolated and qRT-PCR analysis was performed to determine the expression of CAGE and miR-217. Lung tumor tissue lysates were also subjected to immunoblot analysis. \* $p < 0.05$ ; \*\* $p < 0.005$ ; \*\*\* $p < 0.0005$ .

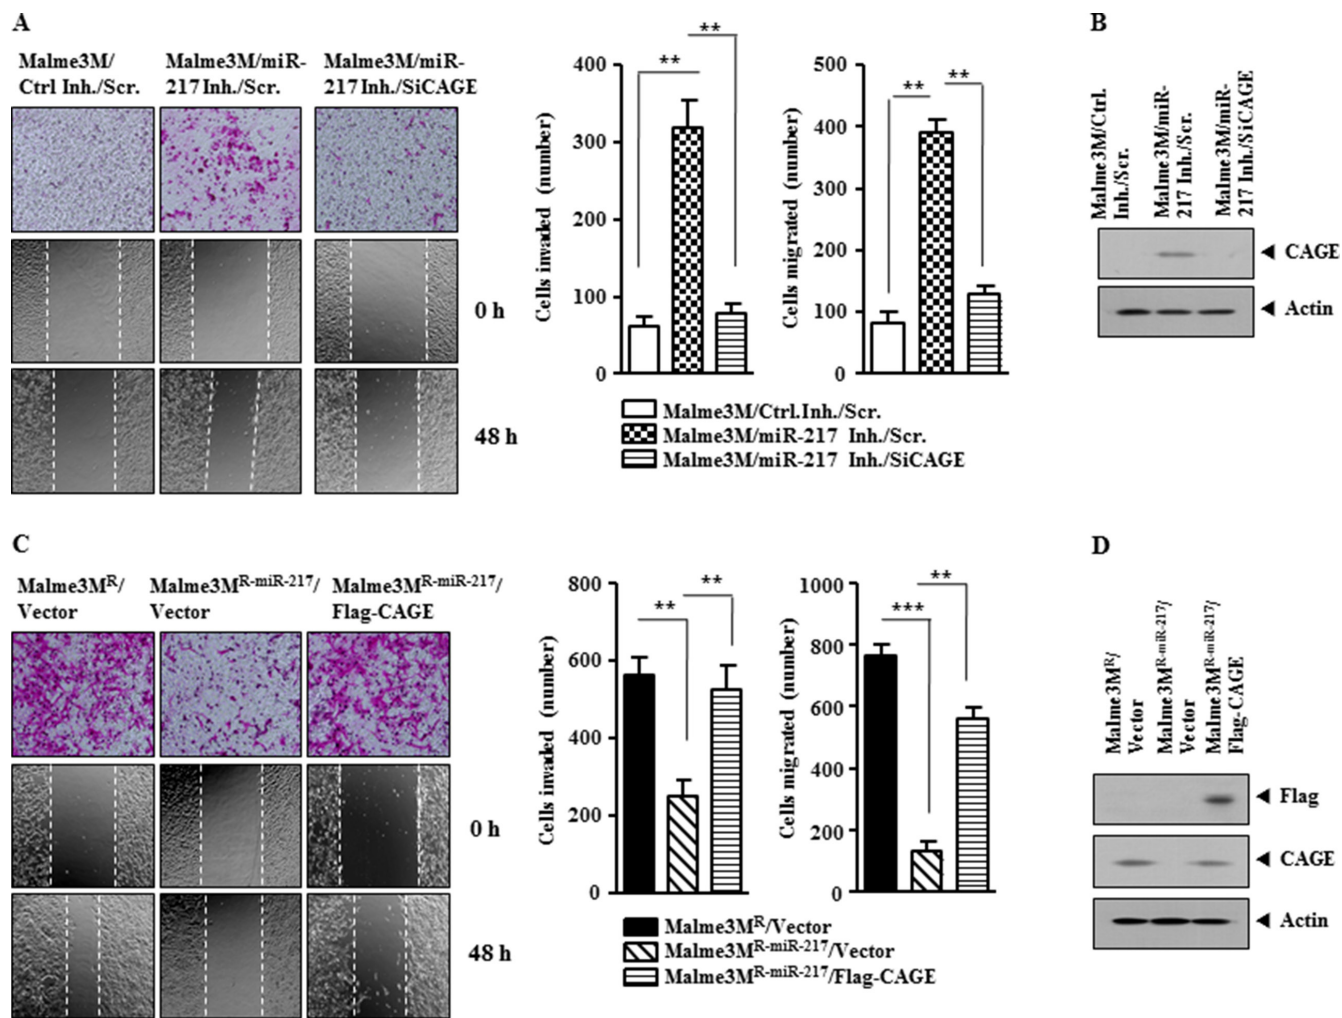

**Supplementary Figure S2: The effect of miR-217 on the migration and invasion potential of cancer cells is dependent on CAGE.** (A) Malme3M cells were transiently transfected with the indicated inhibitor (10 nM) along with the indicated siRNA (10 nM). At 48 h after transfection, cells were subjected to wound migration assays or invasion assays.  $**p < 0.005$ . (B) Same as (A) except that immunoblot analysis was performed. (C) The indicated cancer cells were transfected with control vector (1  $\mu$ g) or Flag-CAGE (1  $\mu$ g). At 48 h after transfection, cells were subjected to wound migration assays or invasion assays.  $**p < 0.005$ ;  $***p < 0.0005$ . (D) Same as (C) except that immunoblot analysis was performed.

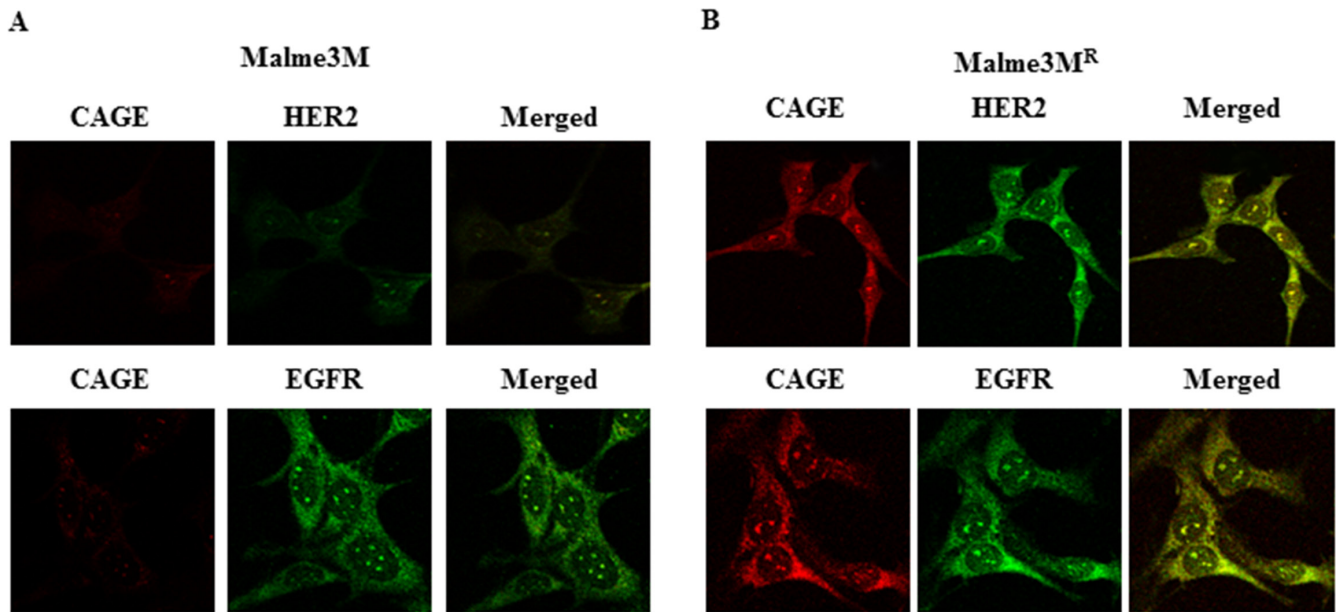

**Supplementary Figure S3: CAGE shows co-localization with EGFR and HER2 in Malme3M<sup>R</sup> cells.** Immunofluorescence staining employing the indicated antibody was performed in Malme3M cells (A) and Malme3M<sup>R</sup> cells (B).

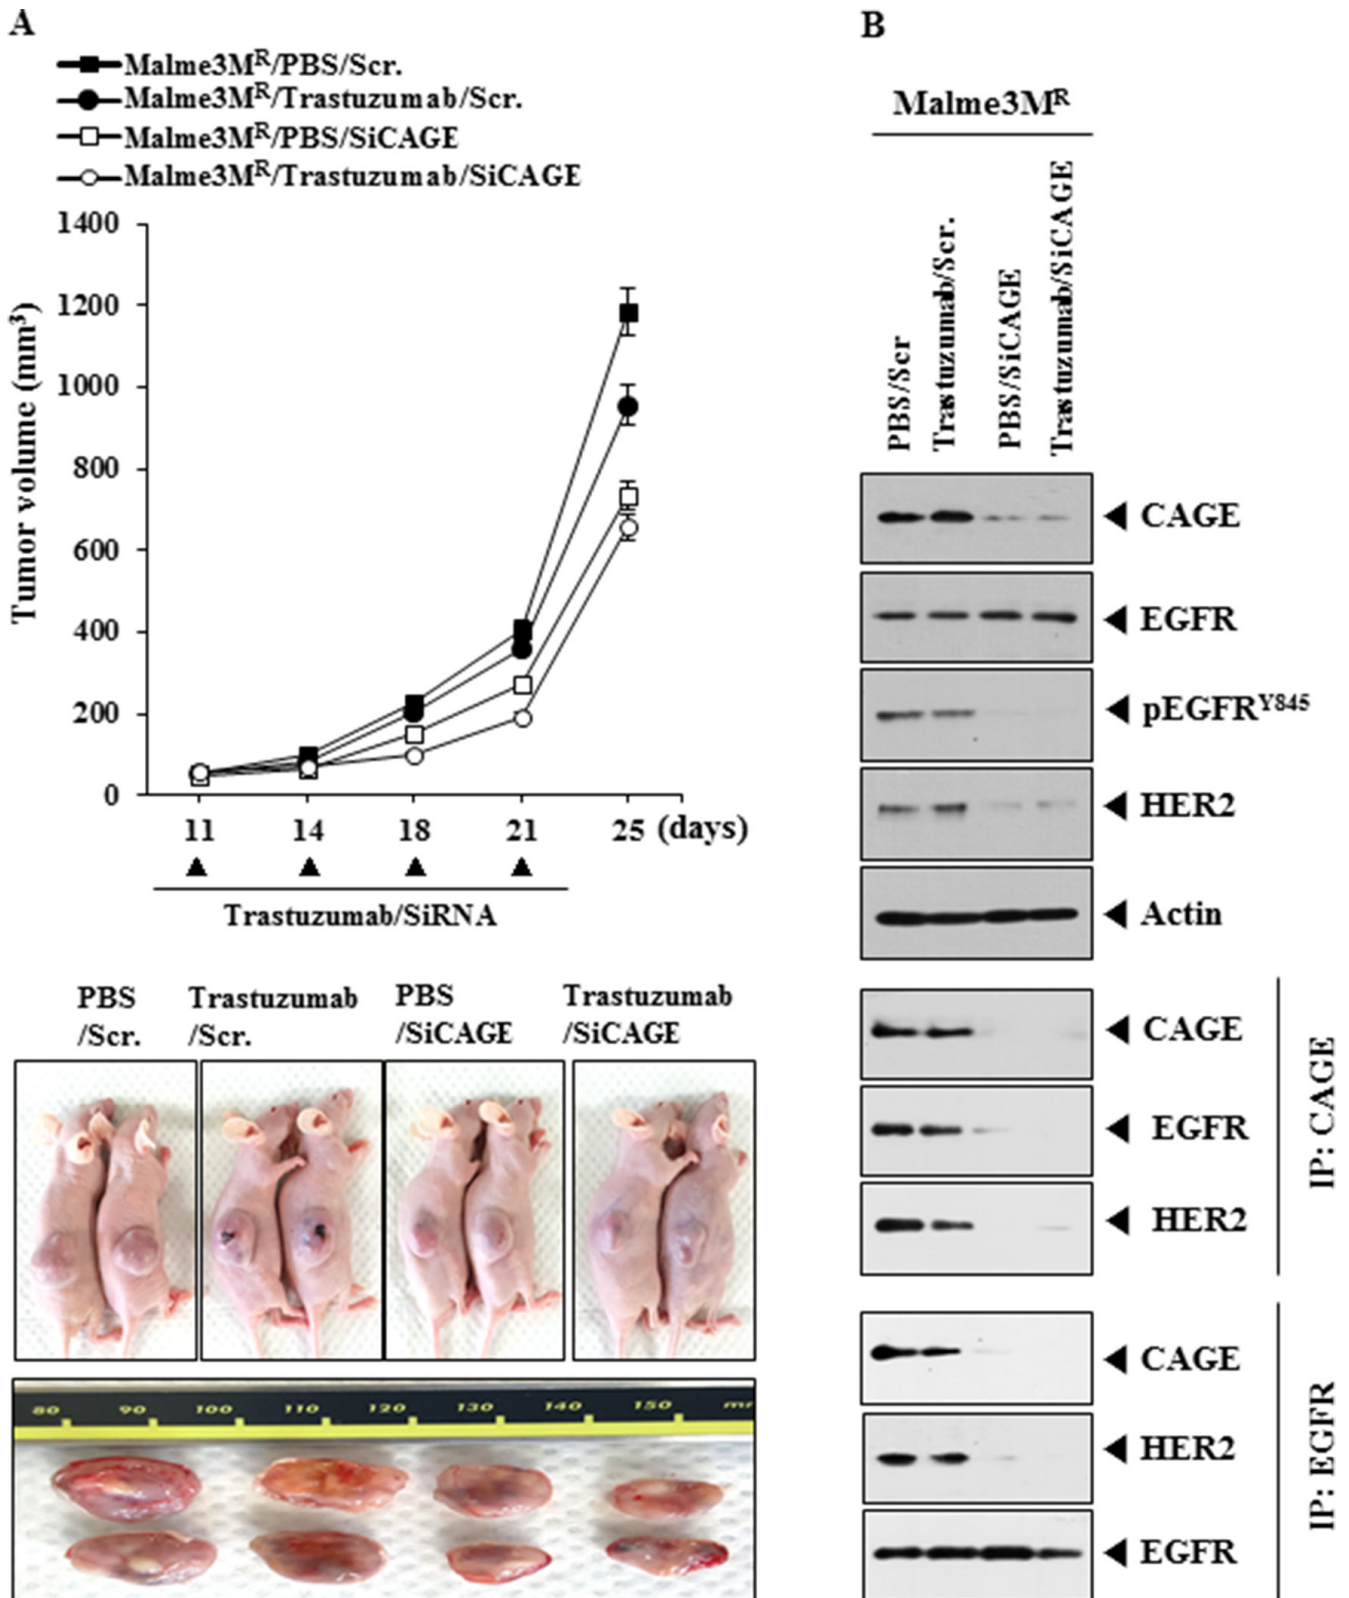

**Supplementary Figure S4: The down-regulation of CAGE decreases the tumorigenic potential of Malme3M<sup>R</sup> cells and enhances *in vivo* sensitivity to trastuzumab.** (A) Malme3M<sup>R</sup> cells ( $1 \times 10^6$ ) were injected subcutaneously into the dorsal flank area of the mice. Following the establishment of sizeable tumor, trastuzumab (10 mg/kg) was administered via tail vein. To determine the effect of CAGE on the *in vivo* tumorigenic potential, scrambled siRNA (100 nM) or siCAGE (100 nM) was injected along with or without trastuzumab (10 mg/kg) via tail vein 4 times in a total of 25 days. (B) Tumor tissue lysates were subjected to immunoprecipitation and immunoblot analysis.

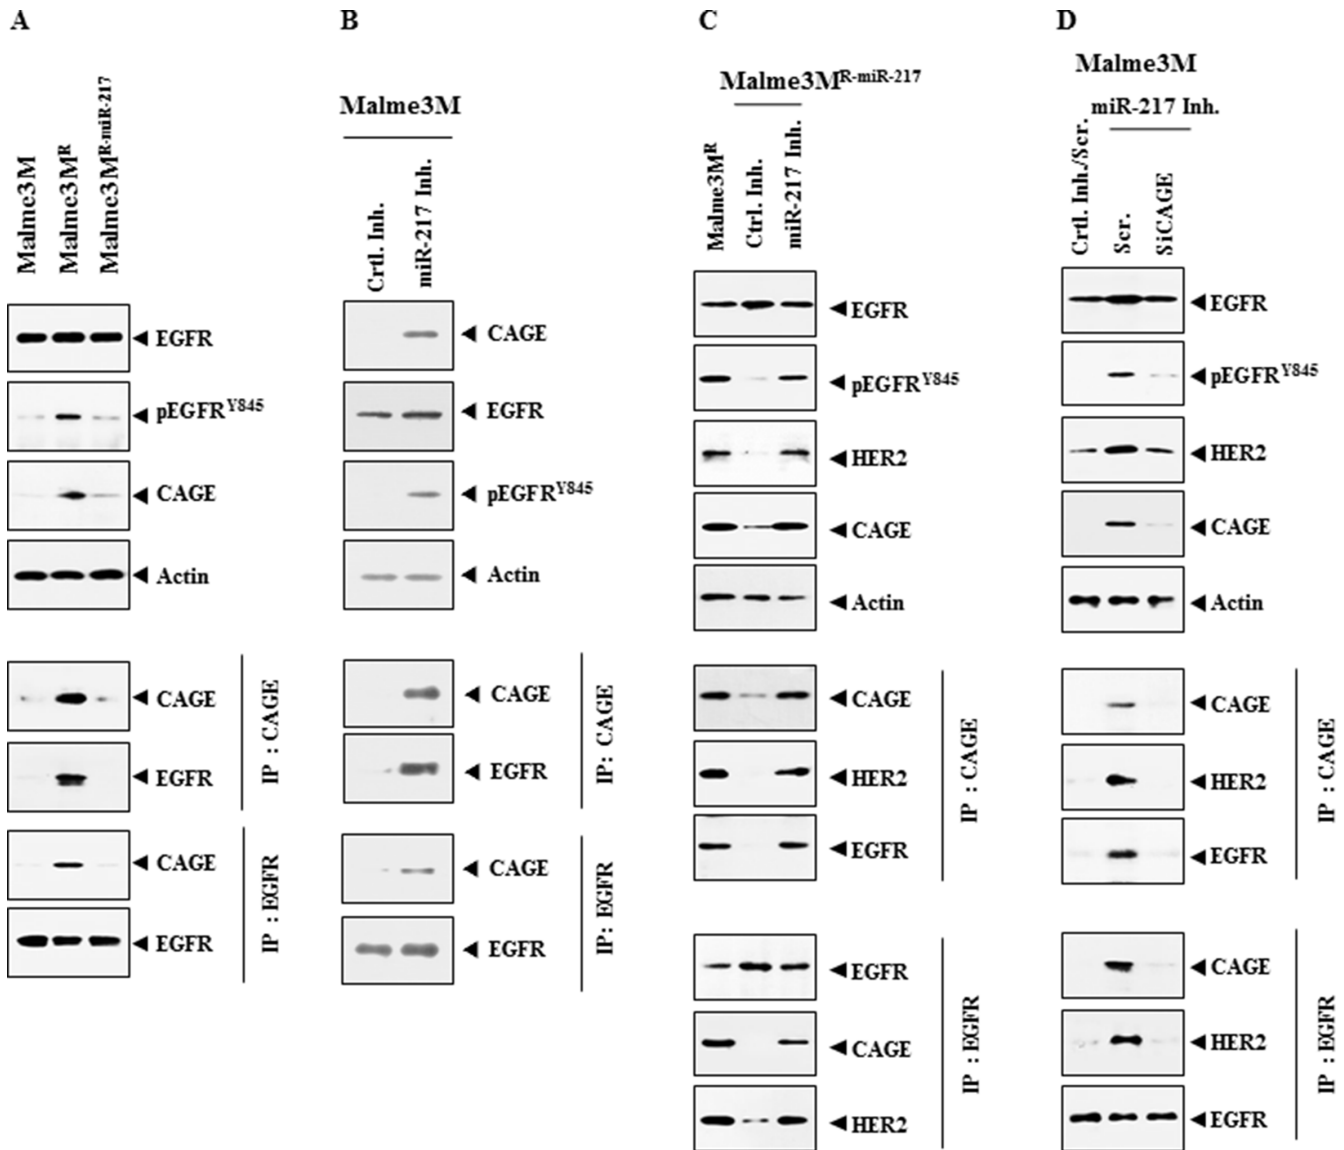

**Supplementary Figure S5: miR-217 inhibitor increases the expression of pEGFR<sup>Y845</sup> and induces the interaction between CAGE and EGFR.** (A) Cell lysates prepared from the indicated cancer cell line were immunoprecipitated with the indicated antibody (2 µg/ml), followed by immunoblot analysis. Cell lysates were also subjected to immunoblot analysis. (B) Malme3M cells were transiently transfected with the indicated inhibitor (10 nM). At 48 h after transfection, cell lysates were immunoprecipitated with the indicated antibody (2 µg/ml), followed by immunoblot analysis. Cell lysates were also subjected to immunoblot analysis. (C) Malme3M<sup>R-miR-217</sup> cells were transiently transfected with the indicated inhibitor (10 nM). At 48 h after transfection, cell lysates were immunoprecipitated with the indicated antibody (2 µg/ml), followed by immunoblot analysis. Cell lysates from Malme3M<sup>R</sup> cells were immunoprecipitated with the indicated antibody (2 µg/ml), followed by immunoblot analysis. (D) Malme3M cells were transfected with the indicated inhibitor (10 nM) along with the indicated siRNA (10 nM). At 48 h after transfection, cell lysates were immunoprecipitated with the indicated antibody (2 µg/ml), followed by immunoblot analysis. Cell lysates were also subjected to immunoblot analysis.
